# Supplementary material for: Heteropolyacid encapsulation into the MOF: influence of acid particles distribution on ethanol conversion in hybrid nanomaterials
Source: Royal Society of Chemistry journal article supplement (doi:10.1039/c2dt31329d), 2012-01-01
Supplement: c2dt31329d.pdf [file c2dt31329d.pdf]

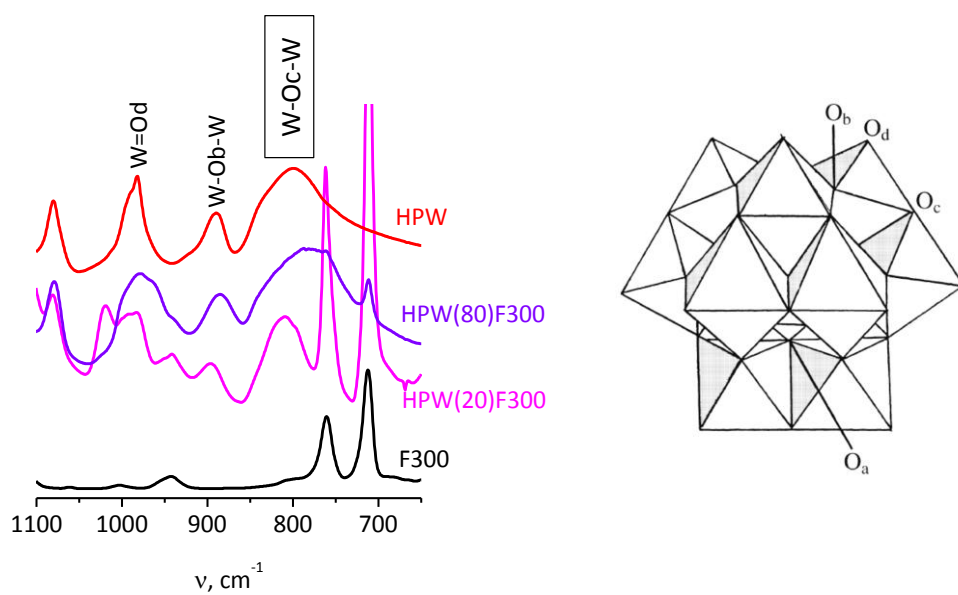

Figure S 1

IR spectra of F300, HPW and hybrid materials recorded in KBr technique, normalized to the same intensity of the W-Oc-W band.

Figure shows the shift in the position as well as the shape of the W-Oc-W band due to the confinement effect. The band characteristic of W-Oc-W vibration are similar for pure HPW and HPW(80)F300 but looks distinctly different for HPW(20)F300.
